# Supplementary material
Source: Springer Nature journal article supplement (https://www.springermedizin.de/resource/supplementary/12987_2008_296_MOESM1_ESM.pdf/9611704)

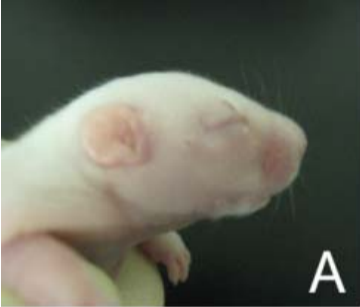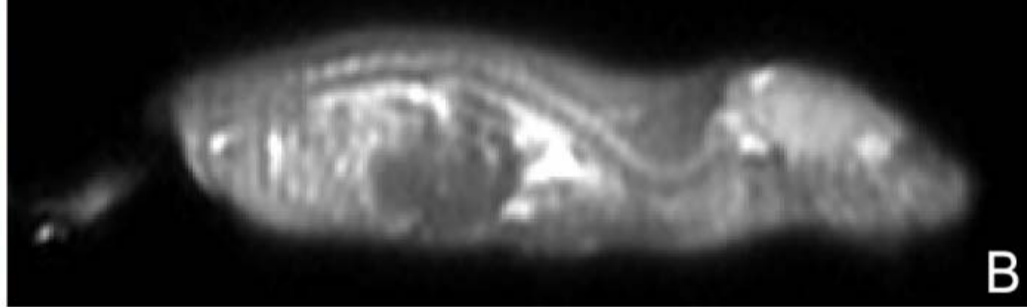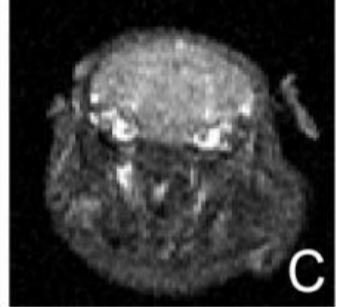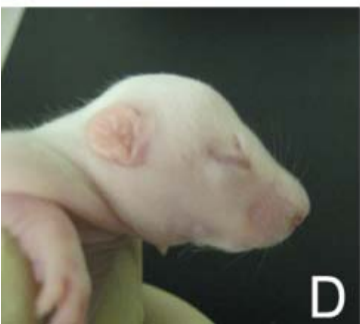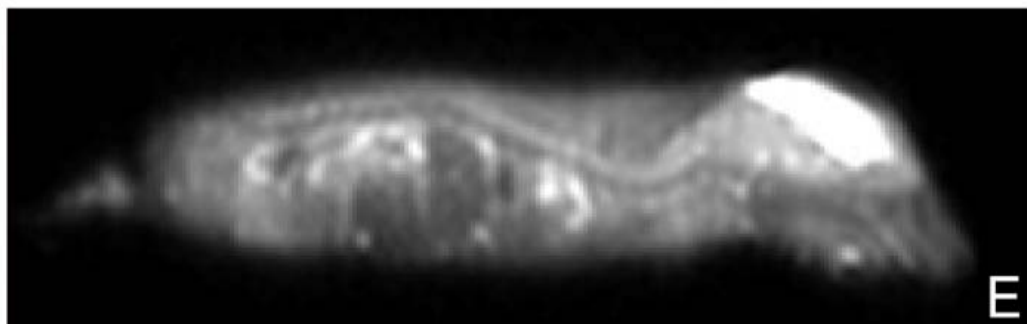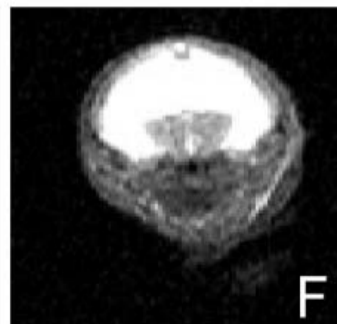

Supplement: MOESM1 [file 9611704]
